# Supplementary material for: Molybdenum and tungsten doped SnO2 transparent conductive thin films with broadband high transmittance between the visible and near-infrared regions
Source: Royal Society of Chemistry journal article supplement (doi:10.1039/c7ce00705a), 2017-01-01
Supplement: c7ce00705a1.pdf [file c7ce00705a1.pdf]

## **Electronic Supporting Information**

# ***Molybdenum and Tungsten Doped SnO<sub>2</sub> Transparent Conductive Thin Films with Broadband High Transmittance between the Visible and Near-infrared Regions***

Xinxin Huo, Shenglin Jiang, Pin Liu, Meng Shen, Shiyong Qiu, and Ming-Yu Li\*

*School of Optical and Electronic Information, Huazhong University of Science and  
Technology, Wuhan 430074, P. R. China.*

*E-mail: [mingyuli.oliver@gmail.com](mailto:mingyuli.oliver@gmail.com).*

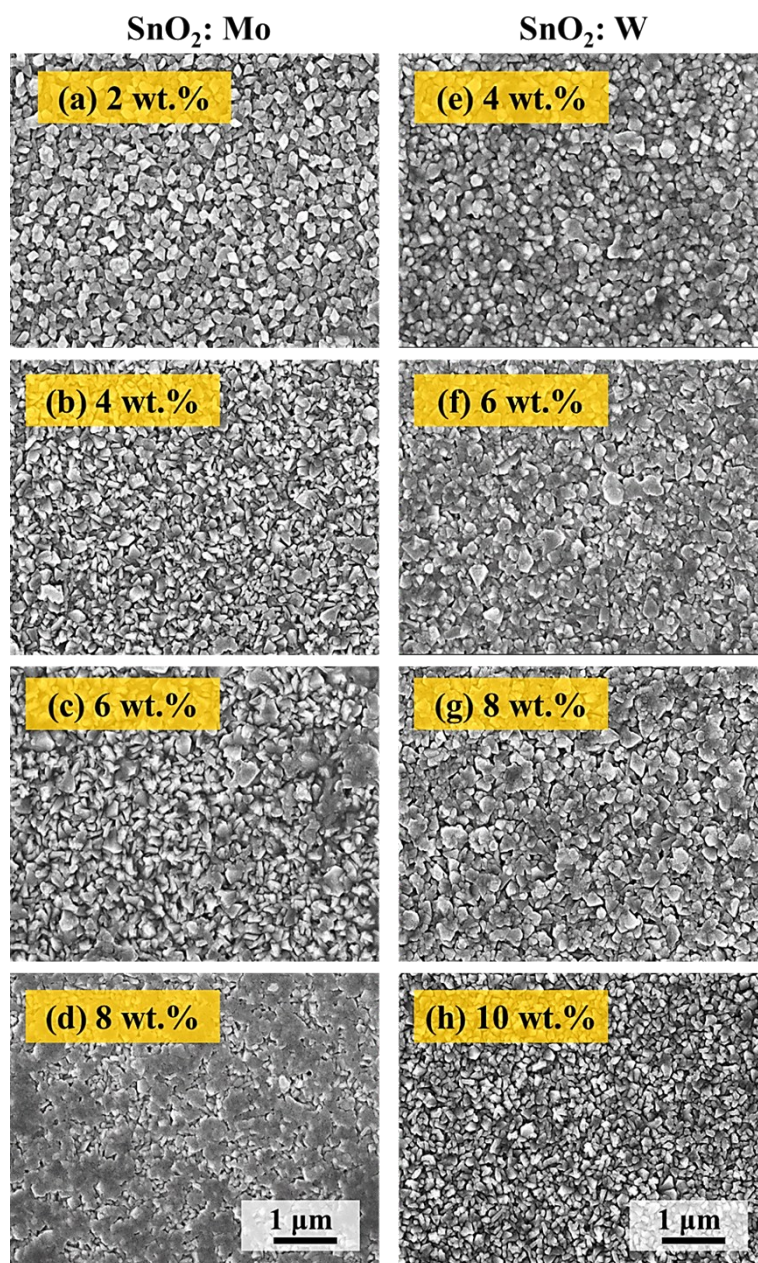

**Fig. S1** Scanning Electron Microscopy (SEM) images of SnO<sub>2</sub>: Mo and SnO<sub>2</sub>: W samples with a variation of doping concentrations: (a) 2 wt.% (b) 4 wt.% (c) 6 wt.% and (d) 8 wt.% Mo, (e) 4 wt.% (f) 6 wt.% (g) 8 wt.% and (h) 10 wt.% W. SEM images are 5.8 (x) × 4.7 (y) μm<sup>2</sup>.

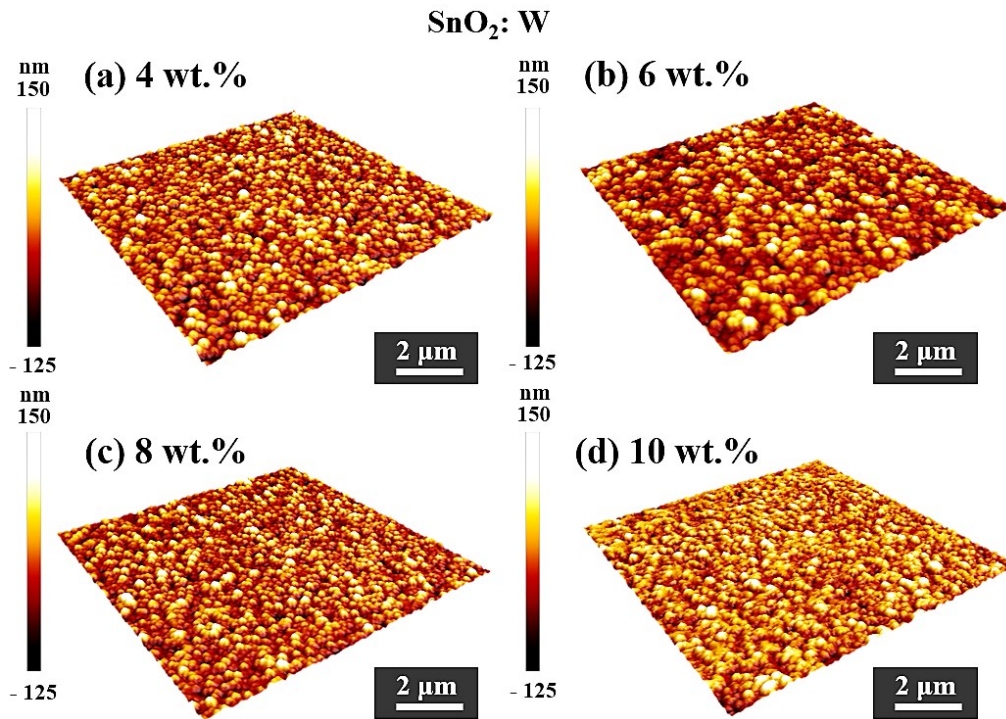

**Fig. S2** AFM images of SnO<sub>2</sub>: W samples synthesized at 600 °C with various doping concentrations: (a) 4 wt.% (b) 6 wt.% (c) 8 wt.% and (d) 10 wt.%.

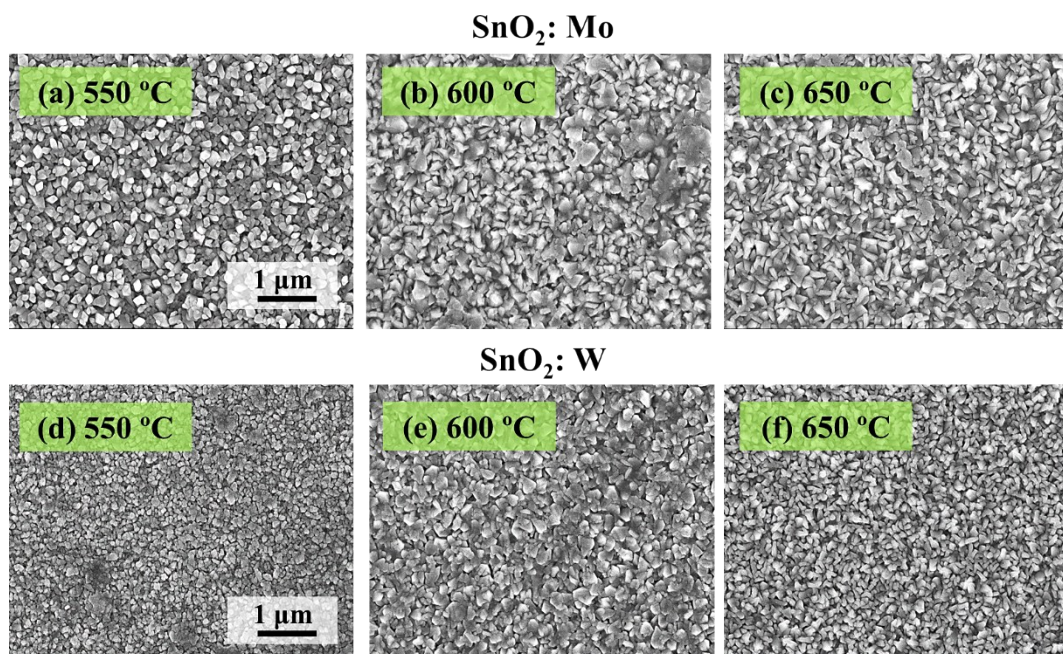

**Fig. S3** SEM images of the SnO<sub>2</sub>: Mo and SnO<sub>2</sub>: W samples synthesized at various annealing temperatures: (a) & (d) 550, (b) & (e) 600, and (c) & (f) 650 °C. SEM images are 5.8 (x) × 4.7 (y) μm<sup>2</sup>.

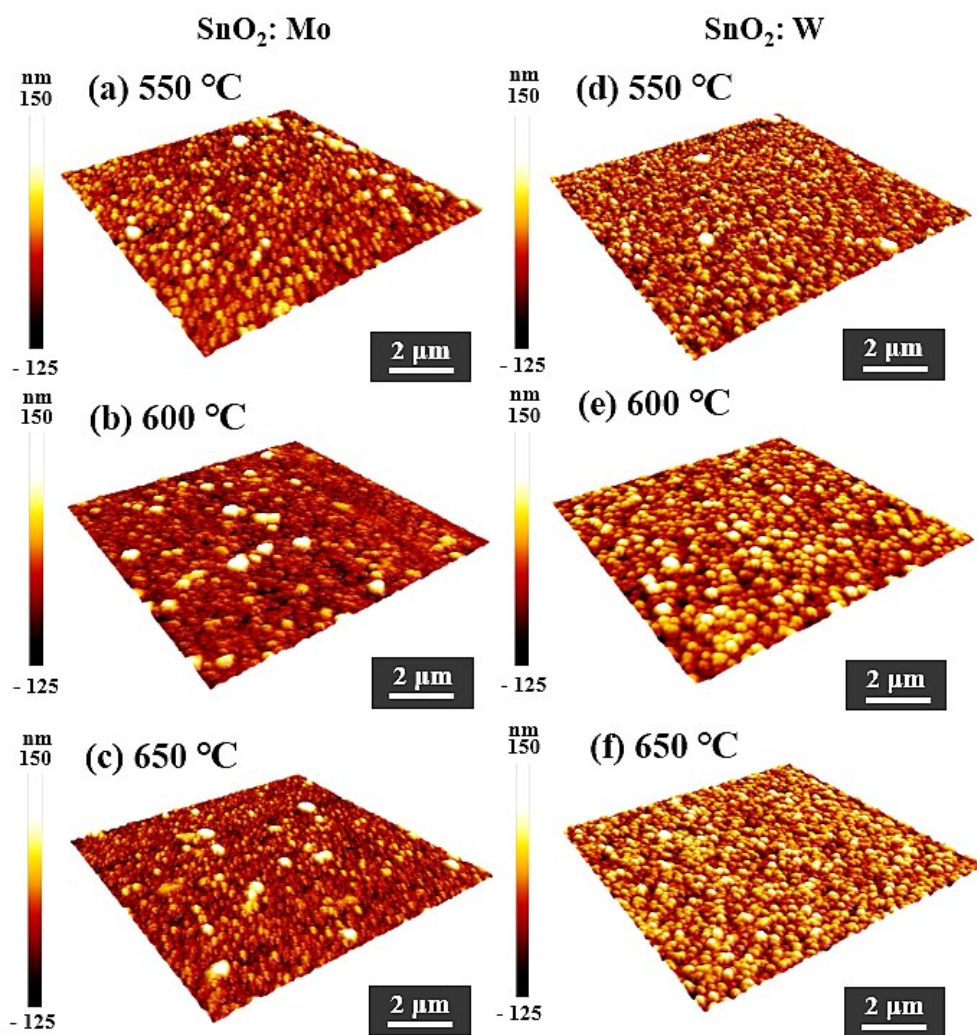

**Fig. S4** AFM side-views of  $\text{SnO}_2:\text{W}$  samples synthesized at various annealing temperatures: (a) - (d) 550 (b) - (e) 600 and (c) - (f) 650 °C.

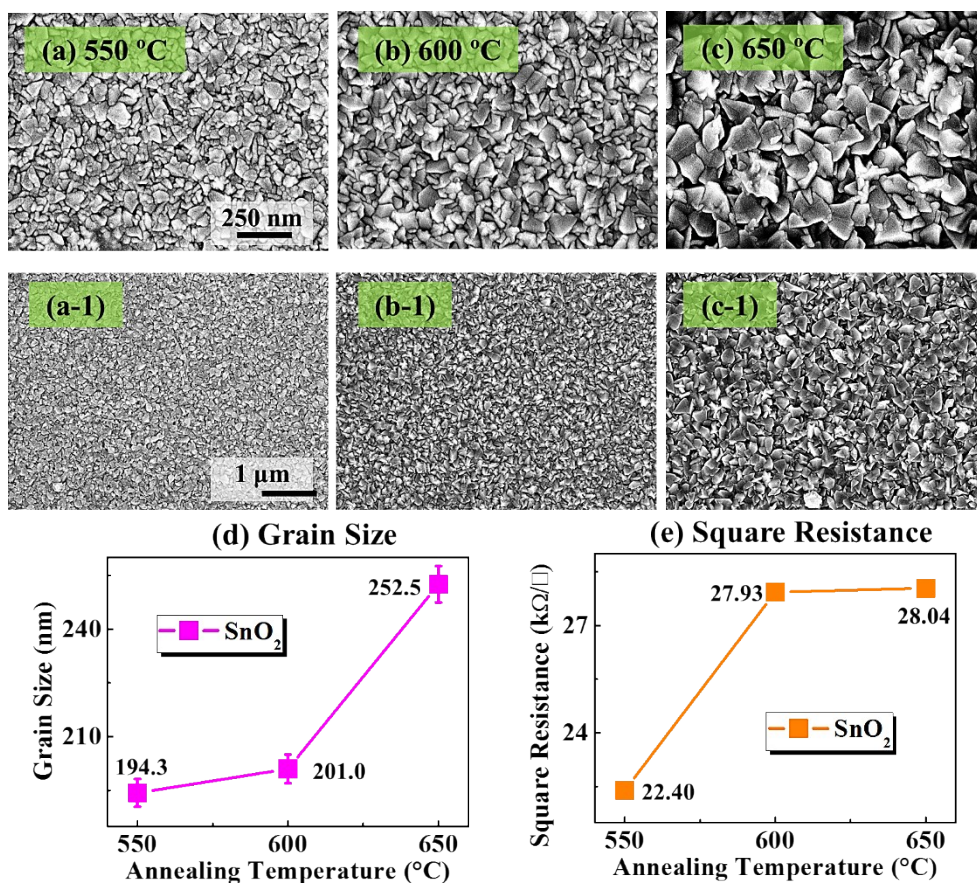

**Fig. S5** SEM images of pristine SnO<sub>2</sub> samples synthesized at various annealing temperatures: (a) 550 (b) 600 and (c) 650 °C. SEM images are (a) - (c) 2.2 (x) × 1.8 (y) μm<sup>2</sup> and (a-1) - (c-1) 5.8 (x) × 4.7 (y) μm<sup>2</sup>. (d) Average grain size of the pristine SnO<sub>2</sub> thin films. (e) Square Resistance of the pristine SnO<sub>2</sub> thin films.

### SnO<sub>2</sub>: Mo

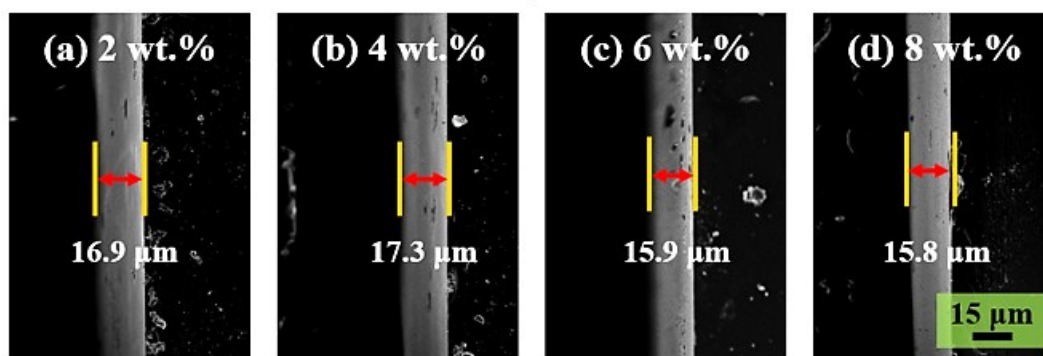

### SnO<sub>2</sub>: W

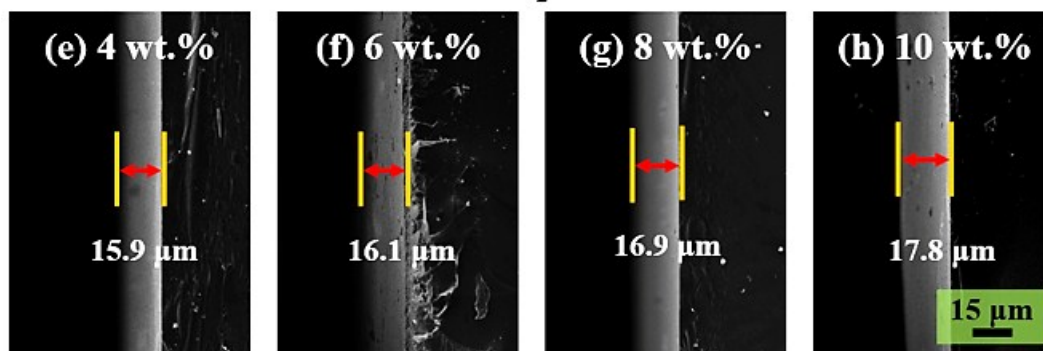

**Fig. S6** Cross sectional SEM images of the SnO<sub>2</sub>: Mo and SnO<sub>2</sub>: W samples synthesized at 600 °C with various doping concentrations: (a) 2 wt.% (b) 4 wt.% (c) 6 wt.% and (d) 8 wt.% Mo, (e) 4 wt.% (f) 6 wt.% (g) 8 wt.% and (h) 10 wt.% W.

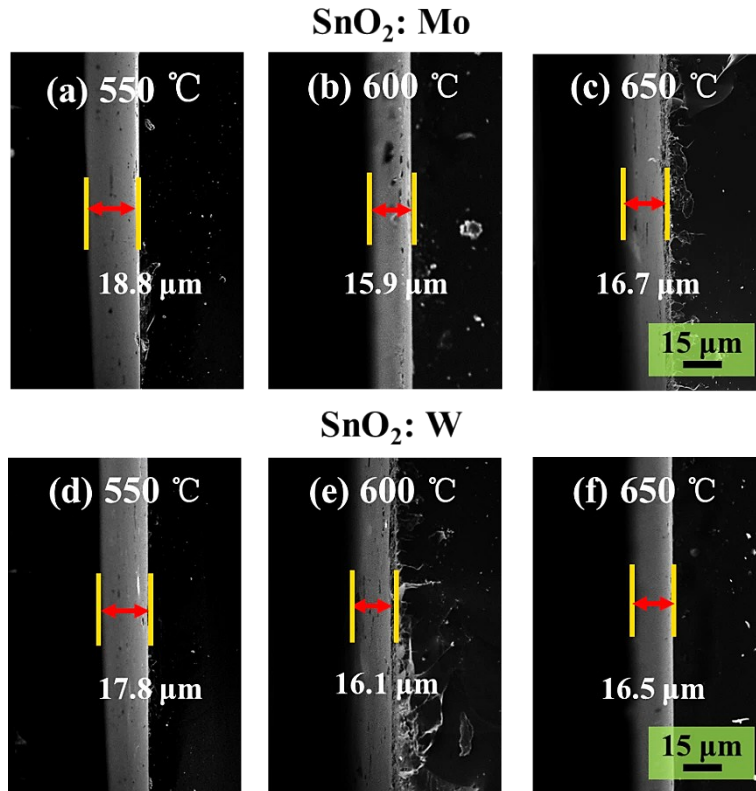

**Fig. S7** Cross sectional SEM images of SnO<sub>2</sub>: Mo and SnO<sub>2</sub>: W samples synthesized at various annealing temperatures: (a) & (d) 550, (b) & (e) 600, and (c) & (f) 650 °C.



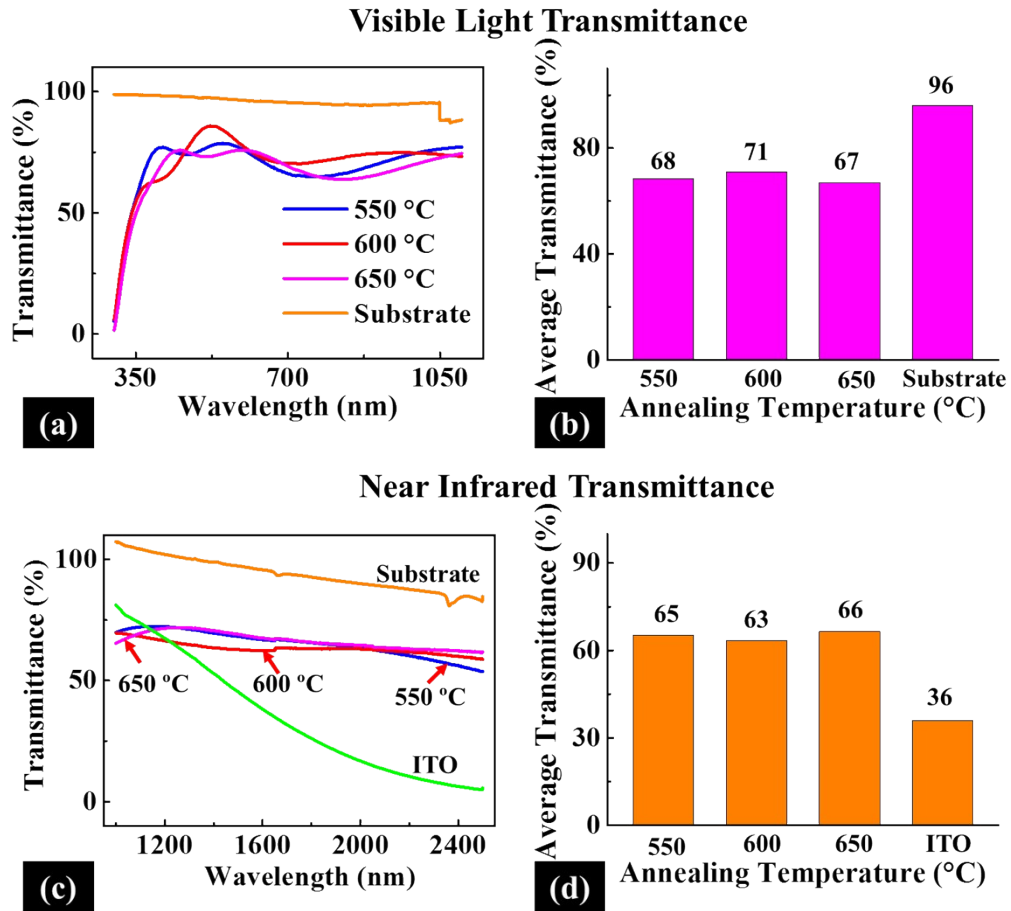

**Fig. S8** (a) Visible transmittance spectra and (b) average transmittance over a wavelength range between 300 and 1100 nm of un-doped SnO<sub>2</sub> thin films annealed at various temperatures between 550 and 650 °C. (c) Near infrared (NIR) transmittance spectra over a wavelength range between 1000 and 2500 nm of un-doped SnO<sub>2</sub> samples annealed at various temperatures between 550 and 650 °C. (d) The corresponding average transmittance of un-doped SnO<sub>2</sub> thin films.

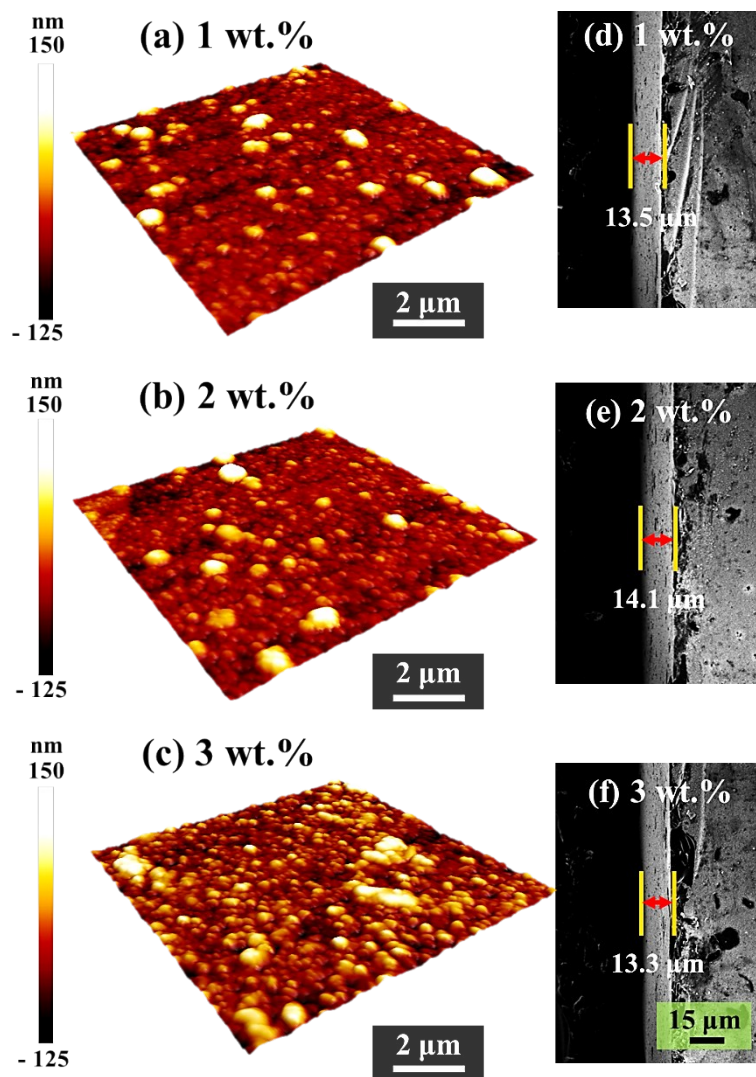

**Fig. S9** AFM images of SnO<sub>2</sub>: Mo: W samples synthesized at 600°C by varying the W doping concentrations with a fixed Mo concentration of 2 wt.%. (a) 1 wt.% (b) 2 wt.% and (c) 3 wt.% W. (d) - (f) Cross sectional SEM images of the co-doped SnO<sub>2</sub> samples.
